# Supplementary material for: Contrasting Inter- and Intraspecies Recombination Patterns in the “Harveyi Clade” Vibrio Collected over Large Spatial and Temporal Scales
Source: PubMed Central journal article supplement (PMC4316622; doi:10.1093/gbe/evu269), 2014-12-19

**Supplementary Material for:**

Contrasting inter- and intraspecies recombination patterns in the 'Harveyi clade' *Vibrio* collected over large spatial and temporal scales.

Henryk Urbanczyk, Yoshitoshi Ogura, Tetsuya Hayashi.



## Supplementary table S2.

**Supplementary table S2**

Number of identified recombination events. Blue: analysis of interspecies recombination events, orange: analysis recombination events in strains isolated in the Miyazaki prefecture within a short time frame, green: analysis of intraspecies recombination events.

| Strains used in the analysis                  |                                              |                                               |                                              | Number of identified recombination events | Average ANI between strains from different clades |
|-----------------------------------------------|----------------------------------------------|-----------------------------------------------|----------------------------------------------|-------------------------------------------|---------------------------------------------------|
| <i>Vibrio campbellii</i> 051011E              | <i>V. campbellii</i> 200612B                 | <i>V. harveyi</i> NBRC 15634 <sup>†</sup>     | <i>V. harveyi</i> ZJ0603                     | 6                                         | 87.92                                             |
| <i>V. campbellii</i> 051011E                  | <i>V. campbellii</i> 200612B                 | <i>V. harveyi</i> CAIM 1792                   | <i>V. harveyi</i> VHJR7                      | 9                                         | 88.02                                             |
| <i>V. campbellii</i> 051011E                  | <i>V. campbellii</i> 200612B                 | <i>V. jasicida</i> LMG 25398 <sup>†</sup>     | <i>V. jasicida</i> 200612G                   | 7                                         | 87.15                                             |
| <i>V. campbellii</i> 051011E                  | <i>V. campbellii</i> 200612B                 | <i>V. jasicida</i> 090810c                    | <i>V. jasicida</i> MWB 21                    | 11                                        | 87.21                                             |
| <i>V. campbellii</i> 051011E                  | <i>V. campbellii</i> 200612B                 | <i>V. owensii</i> ATCC 25919                  | <i>V. owensii</i> 051011B                    | 13                                        | 89.74                                             |
| <i>V. campbellii</i> 051011E                  | <i>V. campbellii</i> 200612B                 | <i>V. owensii</i> 1DA3                        | <i>V. owensii</i> LMG 25443 <sup>†</sup>     | 10                                        | 89.76                                             |
| <i>V. campbellii</i> 051011E                  | <i>V. campbellii</i> 200612B                 | <i>V. rotiferianus</i> LMG 21460 <sup>†</sup> | <i>V. rotiferianus</i> Oz08                  | 31                                        | 87.35                                             |
| <i>V. campbellii</i> 151112C                  | <i>V. campbellii</i> HY01                    | <i>V. harveyi</i> NBRC 15634 <sup>†</sup>     | <i>V. harveyi</i> ZJ0603                     | 11                                        | 87.77                                             |
| <i>V. campbellii</i> 151112C                  | <i>V. campbellii</i> HY01                    | <i>V. harveyi</i> CAIM 1792                   | <i>V. harveyi</i> VHJR7                      | 6                                         | 87.87                                             |
| <i>V. campbellii</i> 151112C                  | <i>V. campbellii</i> HY01                    | <i>V. jasicida</i> LMG 25398 <sup>†</sup>     | <i>V. jasicida</i> 200612G                   | 2                                         | 87.03                                             |
| <i>V. campbellii</i> 151112C                  | <i>V. campbellii</i> HY01                    | <i>V. jasicida</i> 090810c                    | <i>V. jasicida</i> MWB 21                    | 9                                         | 87.11                                             |
| <i>V. campbellii</i> 151112C                  | <i>V. campbellii</i> HY01                    | <i>V. owensii</i> ATCC 25919                  | <i>V. owensii</i> 051011B                    | 14                                        | 89.68                                             |
| <i>V. campbellii</i> 151112C                  | <i>V. campbellii</i> HY01                    | <i>V. owensii</i> 1DA3                        | <i>V. owensii</i> LMG 25443 <sup>†</sup>     | 12                                        | 89.71                                             |
| <i>V. campbellii</i> 151112C                  | <i>V. campbellii</i> HY01                    | <i>V. rotiferianus</i> LMG 21460 <sup>†</sup> | <i>V. rotiferianus</i> Oz08                  | 31                                        | 87.16                                             |
| <i>V. campbellii</i> 151112C                  | <i>V. campbellii</i> HY01                    | <i>Vibrio</i> sp. 151112A                     | <i>Vibrio</i> sp. 090810a                    | 7                                         | 86.32                                             |
| <i>V. campbellii</i> DS40M4                   | <i>V. campbellii</i> NBRC 15631 <sup>†</sup> | <i>V. harveyi</i> NBRC 15634 <sup>†</sup>     | <i>V. harveyi</i> ZJ0603                     | 0                                         | 87.74                                             |
| <i>V. campbellii</i> DS40M4                   | <i>V. campbellii</i> NBRC 15631 <sup>†</sup> | <i>V. harveyi</i> CAIM 1792                   | <i>V. harveyi</i> VHJR7                      | 7                                         | 87.83                                             |
| <i>V. campbellii</i> DS40M4                   | <i>V. campbellii</i> NBRC 15631 <sup>†</sup> | <i>V. jasicida</i> LMG 25398 <sup>†</sup>     | <i>V. jasicida</i> 200612G                   | 3                                         | 86.84                                             |
| <i>V. campbellii</i> DS40M4                   | <i>V. campbellii</i> NBRC 15631 <sup>†</sup> | <i>V. jasicida</i> 090810c                    | <i>V. jasicida</i> MWB 21                    | 2                                         | 86.90                                             |
| <i>V. campbellii</i> DS40M4                   | <i>V. campbellii</i> NBRC 15631 <sup>†</sup> | <i>V. owensii</i> ATCC 25919                  | <i>V. owensii</i> 051011B                    | 6                                         | 89.46                                             |
| <i>V. campbellii</i> DS40M4                   | <i>V. campbellii</i> NBRC 15631 <sup>†</sup> | <i>V. owensii</i> 1DA3                        | <i>V. owensii</i> LMG 25443 <sup>†</sup>     | 5                                         | 89.52                                             |
| <i>V. campbellii</i> DS40M4                   | <i>V. campbellii</i> NBRC 15631 <sup>†</sup> | <i>V. rotiferianus</i> LMG 21460 <sup>†</sup> | <i>V. rotiferianus</i> Oz08                  | 5                                         | 86.97                                             |
| <i>V. campbellii</i> DS40M4                   | <i>V. campbellii</i> NBRC 15631 <sup>†</sup> | <i>Vibrio</i> sp. 151112A                     | <i>Vibrio</i> sp. 090810a                    | 0                                         | 86.28                                             |
| <i>V. harveyi</i> NBRC 15634 <sup>†</sup>     | <i>V. harveyi</i> ZJ0603                     | <i>V. jasicida</i> LMG 25398 <sup>†</sup>     | <i>V. jasicida</i> 200612G                   | 6                                         | 86.16                                             |
| <i>V. harveyi</i> NBRC 15634 <sup>†</sup>     | <i>V. harveyi</i> ZJ0603                     | <i>V. jasicida</i> 090810c                    | <i>V. jasicida</i> MWB 21                    | 13                                        | 86.20                                             |
| <i>V. harveyi</i> NBRC 15634 <sup>†</sup>     | <i>V. harveyi</i> ZJ0603                     | <i>V. owensii</i> ATCC 25919                  | <i>V. owensii</i> 051011B                    | 25                                        | 88.18                                             |
| <i>V. harveyi</i> NBRC 15634 <sup>†</sup>     | <i>V. harveyi</i> ZJ0603                     | <i>V. owensii</i> 1DA3                        | <i>V. owensii</i> LMG 25443 <sup>†</sup>     | 31                                        | 88.43                                             |
| <i>V. harveyi</i> NBRC 15634 <sup>†</sup>     | <i>V. harveyi</i> ZJ0603                     | <i>V. rotiferianus</i> LMG 21460 <sup>†</sup> | <i>V. rotiferianus</i> Oz08                  | 21                                        | 86.34                                             |
| <i>V. harveyi</i> NBRC 15634 <sup>†</sup>     | <i>V. harveyi</i> ZJ0603                     | <i>Vibrio</i> sp. 151112A                     | <i>Vibrio</i> sp. 090810a                    | 4                                         | 85.50                                             |
| <i>V. harveyi</i> CAIM 1792                   | <i>V. harveyi</i> VHJR7                      | <i>V. jasicida</i> LMG 25398 <sup>†</sup>     | <i>V. jasicida</i> 200612G                   | 9                                         | 86.23                                             |
| <i>V. harveyi</i> CAIM 1792                   | <i>V. harveyi</i> VHJR7                      | <i>V. jasicida</i> 090810c                    | <i>V. jasicida</i> MWB 21                    | 16                                        | 86.22                                             |
| <i>V. harveyi</i> CAIM 1792                   | <i>V. harveyi</i> VHJR7                      | <i>V. owensii</i> ATCC 25919                  | <i>V. owensii</i> 051011B                    | 15                                        | 87.76                                             |
| <i>V. harveyi</i> CAIM 1792                   | <i>V. harveyi</i> VHJR7                      | <i>V. owensii</i> 1DA3                        | <i>V. owensii</i> LMG 25443 <sup>†</sup>     | 36                                        | 88.51                                             |
| <i>V. harveyi</i> CAIM 1792                   | <i>V. harveyi</i> VHJR7                      | <i>V. rotiferianus</i> LMG 21460 <sup>†</sup> | <i>V. rotiferianus</i> Oz08                  | 15                                        | 86.38                                             |
| <i>V. harveyi</i> CAIM 1792                   | <i>V. harveyi</i> VHJR7                      | <i>Vibrio</i> sp. 151112A                     | <i>Vibrio</i> sp. 090810a                    | 2                                         | 85.58                                             |
| <i>V. jasicida</i> LMG 25398 <sup>†</sup>     | <i>V. jasicida</i> 200612G                   | <i>V. owensii</i> ATCC 25919                  | <i>V. owensii</i> 051011B                    | 29                                        | 89.14                                             |
| <i>V. jasicida</i> LMG 25398 <sup>†</sup>     | <i>V. jasicida</i> 200612G                   | <i>V. owensii</i> 1DA3                        | <i>V. owensii</i> LMG 25443 <sup>†</sup>     | 27                                        | 89.18                                             |
| <i>V. jasicida</i> LMG 25398 <sup>†</sup>     | <i>V. jasicida</i> 200612G                   | <i>V. rotiferianus</i> LMG 21460 <sup>†</sup> | <i>V. rotiferianus</i> Oz08                  | 13                                        | 85.42                                             |
| <i>V. jasicida</i> LMG 25398 <sup>†</sup>     | <i>V. jasicida</i> 200612G                   | <i>Vibrio</i> sp. 151112A                     | <i>Vibrio</i> sp. 090810a                    | 51                                        | 93.53                                             |
| <i>V. jasicida</i> 090810c                    | <i>V. jasicida</i> MWB 21                    | <i>V. owensii</i> ATCC 25919                  | <i>V. owensii</i> 051011B                    | 29                                        | 89.17                                             |
| <i>V. jasicida</i> 090810c                    | <i>V. jasicida</i> MWB 21                    | <i>V. owensii</i> 1DA3                        | <i>V. owensii</i> LMG 25443 <sup>†</sup>     | 27                                        | 89.24                                             |
| <i>V. jasicida</i> 090810c                    | <i>V. jasicida</i> MWB 21                    | <i>V. rotiferianus</i> LMG 21460 <sup>†</sup> | <i>V. rotiferianus</i> Oz08                  | 17                                        | 85.51                                             |
| <i>V. jasicida</i> 090810c                    | <i>V. jasicida</i> MWB 21                    | <i>Vibrio</i> sp. 151112A                     | <i>Vibrio</i> sp. 090810a                    | 63                                        | 93.41                                             |
| <i>V. owensii</i> ATCC 25919                  | <i>V. owensii</i> 051011B                    | <i>V. rotiferianus</i> LMG 21460 <sup>†</sup> | <i>V. rotiferianus</i> Oz08                  | 37                                        | 86.93                                             |
| <i>V. owensii</i> ATCC 25919                  | <i>V. owensii</i> 051011B                    | <i>Vibrio</i> sp. 151112A                     | <i>Vibrio</i> sp. 090810a                    | 8                                         | 87.69                                             |
| <i>V. owensii</i> 1DA3                        | <i>V. owensii</i> LMG 25443 <sup>†</sup>     | <i>V. rotiferianus</i> LMG 21460 <sup>†</sup> | <i>V. rotiferianus</i> Oz08                  | 42                                        | 87.07                                             |
| <i>V. owensii</i> 1DA3                        | <i>V. owensii</i> LMG 25443 <sup>†</sup>     | <i>Vibrio</i> sp. 151112A                     | <i>Vibrio</i> sp. 090810a                    | 12                                        | 87.75                                             |
| <i>V. rotiferianus</i> LMG 21460 <sup>†</sup> | <i>V. rotiferianus</i> Oz08                  | <i>Vibrio</i> sp. 151112A                     | <i>Vibrio</i> sp. 090810a                    | 15                                        | 84.82                                             |
| <i>V. campbellii</i> ATCC BAA-1116            | <i>V. campbellii</i> PEL22A                  | <i>V. harveyi</i> NBRC 15634 <sup>†</sup>     | <i>V. harveyi</i> ZJ0603                     | 4                                         | 87.70                                             |
| <i>V. campbellii</i> ATCC BAA-1116            | <i>V. campbellii</i> PEL22A                  | <i>V. harveyi</i> CAIM 1792                   | <i>V. harveyi</i> VHJR7                      | 5                                         | 87.86                                             |
| <i>V. campbellii</i> ATCC BAA-1116            | <i>V. campbellii</i> PEL22A                  | <i>V. jasicida</i> LMG 25398 <sup>†</sup>     | <i>V. jasicida</i> 200612G                   | 7                                         | 86.99                                             |
| <i>V. campbellii</i> ATCC BAA-1116            | <i>V. campbellii</i> PEL22A                  | <i>V. jasicida</i> 090810c                    | <i>V. jasicida</i> MWB 21                    | 8                                         | 87.03                                             |
| <i>V. campbellii</i> ATCC BAA-1116            | <i>V. campbellii</i> PEL22A                  | <i>V. owensii</i> ATCC 25919                  | <i>V. owensii</i> 051011B                    | 15                                        | 89.67                                             |
| <i>V. campbellii</i> ATCC BAA-1116            | <i>V. campbellii</i> PEL22A                  | <i>V. owensii</i> 1DA3                        | <i>V. owensii</i> LMG 25443 <sup>†</sup>     | 15                                        | 89.73                                             |
| <i>V. campbellii</i> ATCC BAA-1116            | <i>V. campbellii</i> PEL22A                  | <i>V. rotiferianus</i> LMG 21460 <sup>†</sup> | <i>V. rotiferianus</i> Oz08                  | 24                                        | 87.09                                             |
| <i>V. campbellii</i> ATCC BAA-1116            | <i>V. campbellii</i> PEL22A                  | <i>Vibrio</i> sp. 151112A                     | <i>Vibrio</i> sp. 090810a                    | 5                                         | 86.34                                             |
| <i>V. campbellii</i> ATCC BAA-1116            | <i>V. campbellii</i> DS40M4                  | <i>V. harveyi</i> NBRC 15634 <sup>†</sup>     | <i>V. harveyi</i> ZJ0603                     | 2                                         | 87.73                                             |
| <i>V. campbellii</i> ATCC BAA-1116            | <i>V. campbellii</i> DS40M4                  | <i>V. harveyi</i> CAIM 1792                   | <i>V. harveyi</i> VHJR7                      | 3                                         | 87.87                                             |
| <i>V. campbellii</i> ATCC BAA-1116            | <i>V. campbellii</i> DS40M4                  | <i>V. jasicida</i> LMG 25398 <sup>†</sup>     | <i>V. jasicida</i> 200612G                   | 6                                         | 86.96                                             |
| <i>V. campbellii</i> ATCC BAA-1116            | <i>V. campbellii</i> DS40M4                  | <i>V. jasicida</i> 090810c                    | <i>V. jasicida</i> MWB 21                    | 7                                         | 87.01                                             |
| <i>V. campbellii</i> ATCC BAA-1116            | <i>V. campbellii</i> DS40M4                  | <i>V. owensii</i> ATCC 25919                  | <i>V. owensii</i> 051011B                    | 11                                        | 89.63                                             |
| <i>V. campbellii</i> ATCC BAA-1116            | <i>V. campbellii</i> DS40M4                  | <i>V. owensii</i> 1DA3                        | <i>V. owensii</i> LMG 25443 <sup>†</sup>     | 10                                        | 89.69                                             |
| <i>V. campbellii</i> ATCC BAA-1116            | <i>V. campbellii</i> DS40M4                  | <i>V. rotiferianus</i> LMG 21460 <sup>†</sup> | <i>V. rotiferianus</i> Oz08                  | 22                                        | 87.10                                             |
| <i>V. campbellii</i> ATCC BAA-1116            | <i>V. campbellii</i> DS40M4                  | <i>Vibrio</i> sp. 151112A                     | <i>Vibrio</i> sp. 090810a                    | 3                                         | 86.31                                             |
| <i>V. campbellii</i> 151112C                  | <i>V. campbellii</i> 051011E                 | <i>V. jasicida</i> 090810c                    | <i>V. jasicida</i> 200612G                   | 14                                        | 87.16                                             |
| <i>V. campbellii</i> 151112C                  | <i>V. campbellii</i> 051011E                 | <i>Vibrio</i> sp. 151112A                     | <i>Vibrio</i> sp. 090810a                    | 3                                         | 86.37                                             |
| <i>V. jasicida</i> 090810c                    | <i>V. jasicida</i> 200612G                   | <i>Vibrio</i> sp. 151112A                     | <i>Vibrio</i> sp. 090810a                    | 62                                        | 93.55                                             |
| <i>V. campbellii</i> 051011E                  | <i>V. campbellii</i> 200612B                 | <i>V. jasicida</i> 090810c                    | <i>V. jasicida</i> 200612G                   | 11                                        | 87.13                                             |
| <i>V. campbellii</i> 051011E                  | <i>V. campbellii</i> 200612B                 | <i>Vibrio</i> sp. 151112A                     | <i>Vibrio</i> sp. 090810a                    | 4                                         | 86.33                                             |
| <i>V. campbellii</i> 051011E                  | <i>V. campbellii</i> 200612B                 | <i>V. campbellii</i> DS40M4                   | <i>V. campbellii</i> NBRC 15631 <sup>†</sup> | 47                                        | 96.27                                             |
| <i>V. campbellii</i> 151112C                  | <i>V. campbellii</i> HY01                    | <i>V. campbellii</i> DS40M4                   | <i>V. campbellii</i> NBRC 15631 <sup>†</sup> | 62                                        | 96.05                                             |
| <i>V. campbellii</i> 051011E                  | <i>V. campbellii</i> 200612B                 | <i>V. campbellii</i> ATCC BAA-1116            | <i>V. campbellii</i> PEL22A                  | 191                                       | 96.53                                             |
| <i>V. campbellii</i> 151112C                  | <i>V. campbellii</i> HY01                    | <i>V. campbellii</i> ATCC BAA-1116            | <i>V. campbellii</i> PEL22A                  | 229                                       | 96.39                                             |
| <i>V. campbellii</i> 051011E                  | <i>V. campbellii</i> 200612B                 | <i>V. campbellii</i> ATCC BAA-1116            | <i>V. campbellii</i> DS40M4                  | 162                                       | 96.34                                             |
| <i>V. campbellii</i> 151112C                  | <i>V. campbellii</i> HY01                    | <i>V. campbellii</i> ATCC BAA-1116            | <i>V. campbellii</i> DS40M4                  | 203                                       | 96.22                                             |
| <i>V. campbellii</i> 051011E                  | <i>V. campbellii</i> 200612B                 | <i>V. campbellii</i> NBRC 15631 <sup>†</sup>  | <i>V. campbellii</i> ATCC BAA-1116           | 154                                       | 96.42                                             |
| <i>V. campbellii</i> 151112C                  | <i>V. campbellii</i> HY01                    | <i>V. campbellii</i> NBRC 15631 <sup>†</sup>  | <i>V. campbellii</i> ATCC BAA-1116           | 224                                       | 96.21                                             |
| <i>V. campbellii</i> 051011E                  | <i>V. campbellii</i> 200612B                 | <i>V. campbellii</i> NBRC 15631 <sup>†</sup>  | <i>V. campbellii</i> PEL22A                  | 100                                       | 96.39                                             |
| <i>V. campbellii</i> 151112C                  | <i>V. campbellii</i> HY01                    | <i>V. campbellii</i> NBRC 15631 <sup>†</sup>  | <i>V. campbellii</i> PEL22A                  | 138                                       | 96.21                                             |
| <i>V. campbellii</i> 051011E                  | <i>V. campbellii</i> 200612B                 | <i>V. campbellii</i> DS40M4                   | <i>V. campbellii</i> ATCC BAA-1116           | 163                                       | 96.34                                             |
| <i>V. campbellii</i> 151112C                  | <i>V. campbellii</i> HY01                    | <i>V. campbellii</i> DS40M4                   | <i>V. campbellii</i> ATCC BAA-1116           | 203                                       | 96.22                                             |
| <i>V. campbellii</i> 051011E                  | <i>V. campbellii</i> 200612B                 | <i>V. campbellii</i> DS40M4                   | <i>V. campbellii</i> PEL22A                  | 119                                       | 96.31                                             |
| <i>V. campbellii</i> 151112C                  | <i>V. campbellii</i> HY01                    | <i>V. campbellii</i> DS40M4                   | <i>V. campbellii</i> PEL22A                  | 138                                       | 96.23                                             |

### Supplementary figure S1.

Phylogenetic resolution of the 'Harveyi clade' using parsimonious analysis.

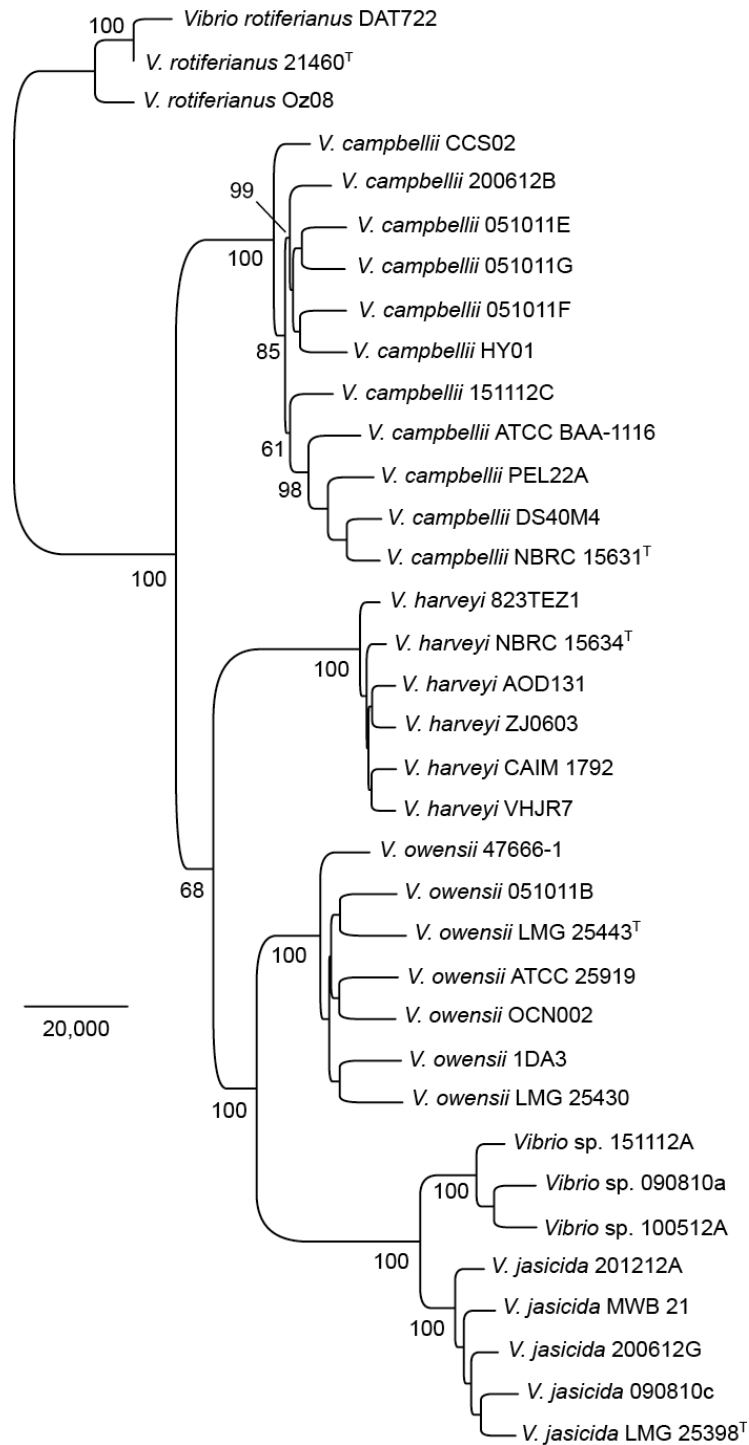

For the analysis an alignment of concatenated sequences of 897 protein coding sequences conserved in the six *Vibrio* species was used. A single most parsimonious tree was found; tree length was equal to 672,871. Jackknife resampling values are reported at the nodes, some omitted for clarity.

### Supplementary figure S2.

Relationship between the number of interspecies recombination events and the average nucleotide identity (ANI). Each marker represents the number of recombination events identified between two pairs of strains from different species plotted against average ANI between strains from different species. A linear trend line is shown.

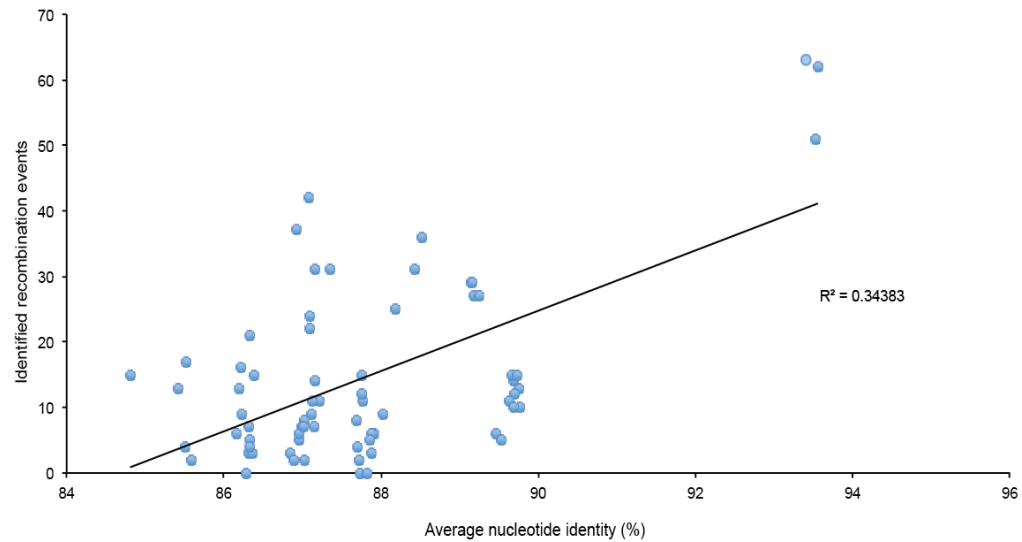

### Supplementary figure S3.

Graphic representation of chromosomal location of 895 protein coding genes conserved in the ‘Harveyi clade’ on the map of *V. campbellii* ATCC BAA-1116 chromosomes. Each rectangle represents 500 (or less) protein coding genes organized in the same order as on the ATCC BAA-1116 chromosomes, starting from the origin of replication. 895 conserved sequences are marked red. Blue rectangles indicate sequences showing evidence of recombination between *V. campbellii* strains identified during six analyses of intraspecies recombination events that included strain ATCC BAA-1116.

The analyses (from top to bottom) are:

1. *V. campbellii* 051011E + *V. campbellii* 200612B and *V. campbellii* ATCC BAA-1116 + *V. campbellii* PEL22A
2. *V. campbellii* 151112C + *V. campbellii* HY01 and *V. campbellii* ATCC BAA-1116 + *V. campbellii* PEL22A
3. *V. campbellii* 051011E + *V. campbellii* 200612B and *V. campbellii* ATCC BAA-1116 + *V. campbellii* DS40M4
4. *V. campbellii* 151112C + *V. campbellii* HY01 and *V. campbellii* ATCC BAA-1116 + *V. campbellii* DS40M4
5. *V. campbellii* 051011E + *V. campbellii* 200612B and *V. campbellii* NBRC 15631T + *V. campbellii* ATCC BAA-1116
6. *V. campbellii* 151112C + *V. campbellii* HY01 and *V. campbellii* NBRC 15631T + *V. campbellii* ATCC BAA-1116

Chromosome I

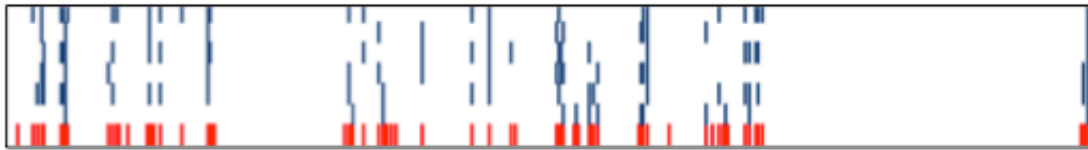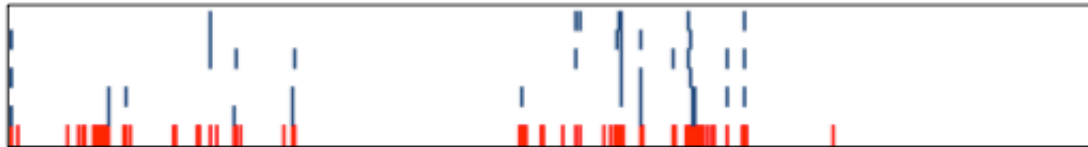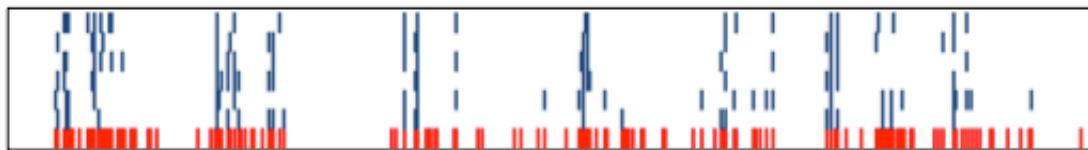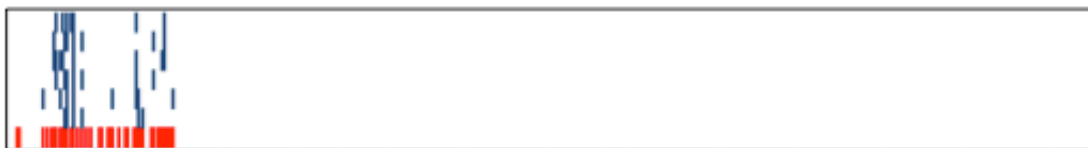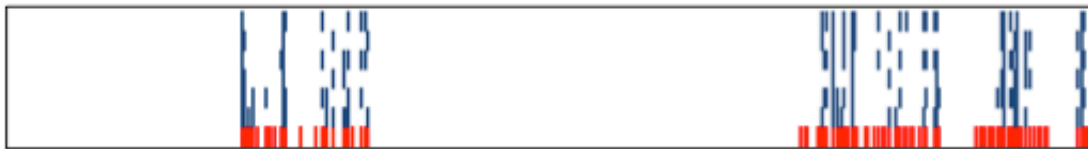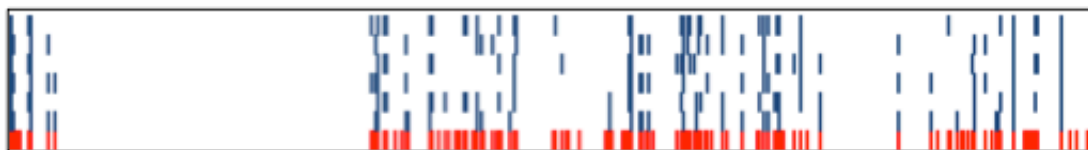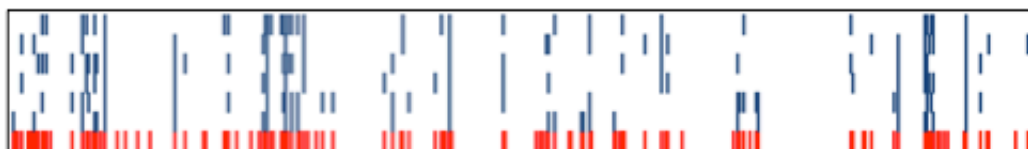

Chromosome II

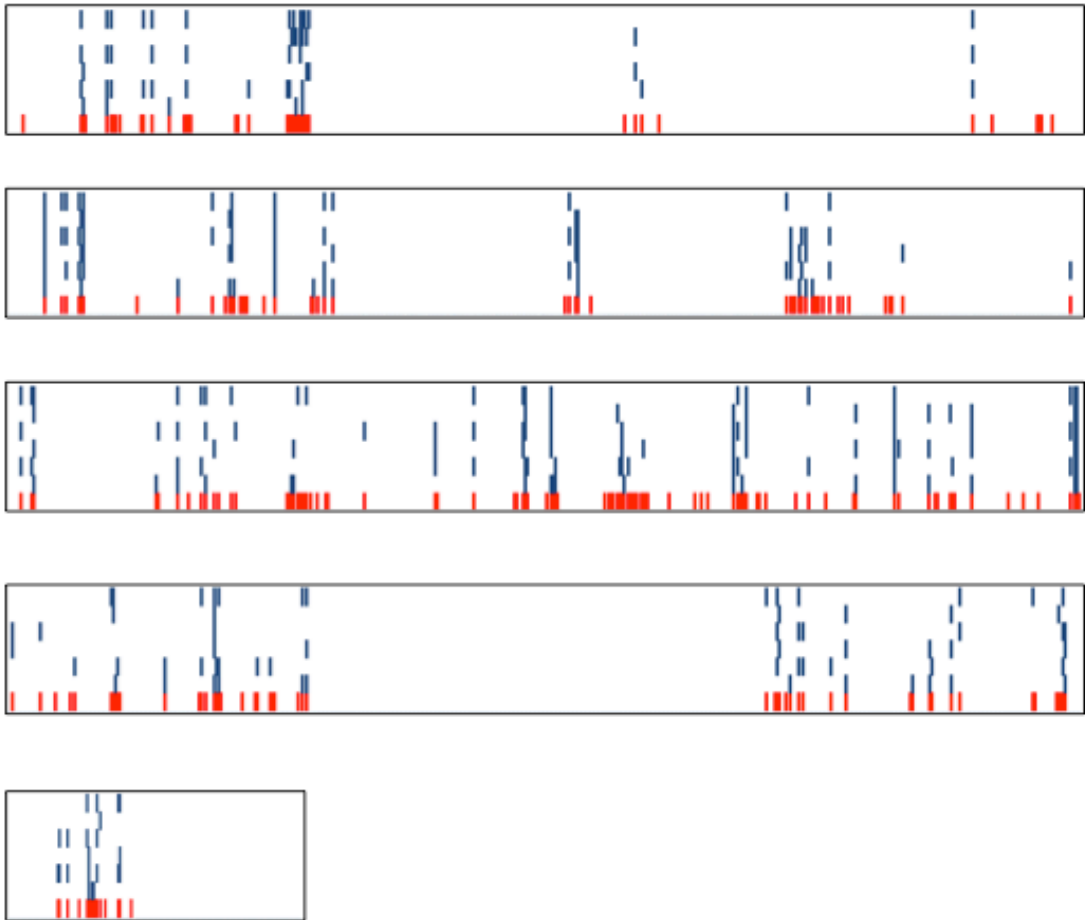



#### **Supplementary figure S4**

ClonalFrame estimation of genealogy among 11 *V. campbellii* strains (A), 5 *V. jasicida* and 3 *Vibrio* sp. strains (B), and 3 *Vibrio* sp. and *V. jasicida* 090810c (C). Next to each strain are estimates of recombination (r) and mutations (m) based on ClonalFrame analyses.

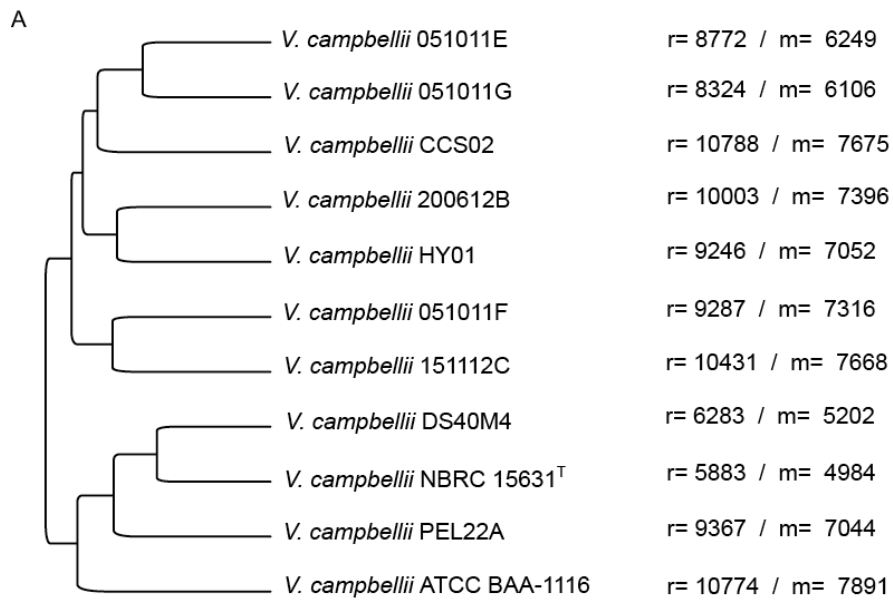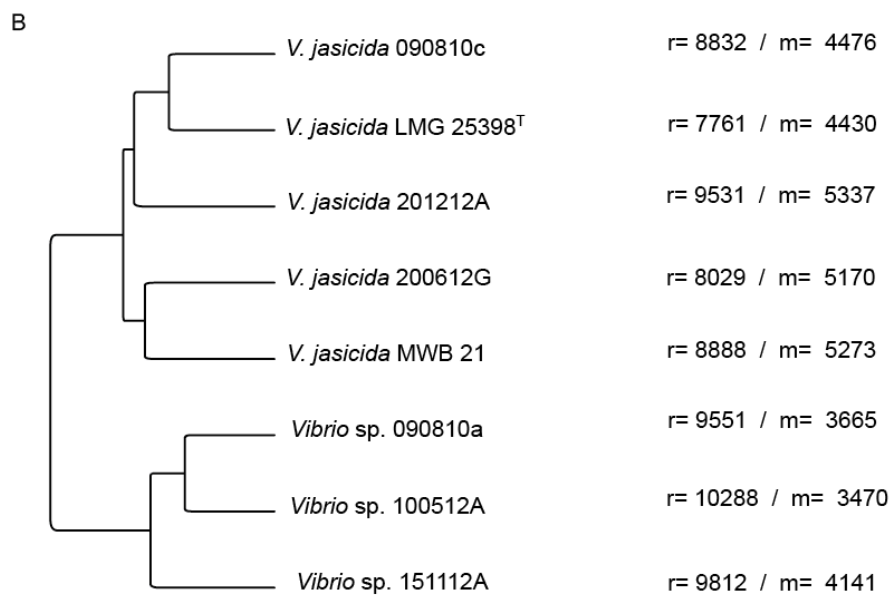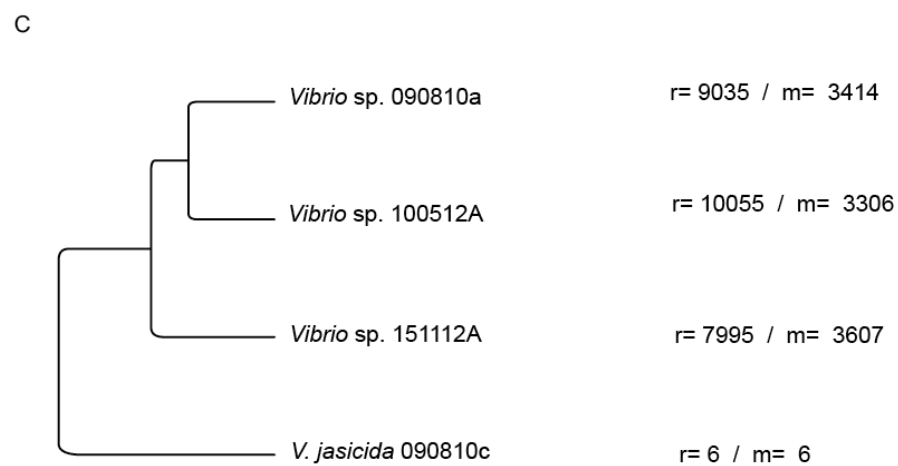

Supplement: supp_evu269_HarveyiRecombinationSupplementaryMaterial.pdf [file supp_evu269_HarveyiRecombinationSupplementaryMaterial.pdf]
